# Supplementary material
Source: PubMed Central journal article supplement (PMC1413684)

A.

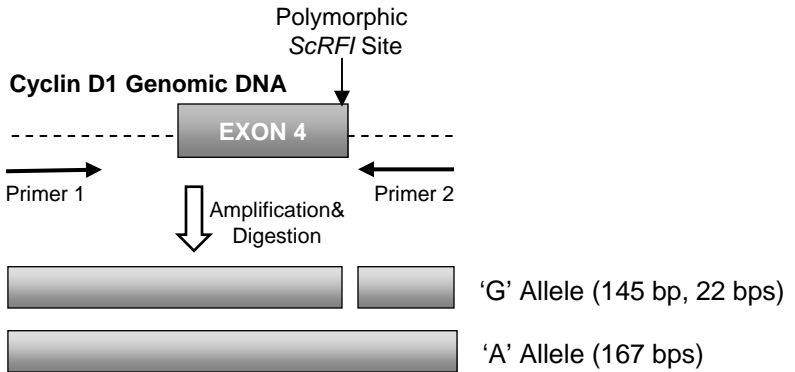

B.

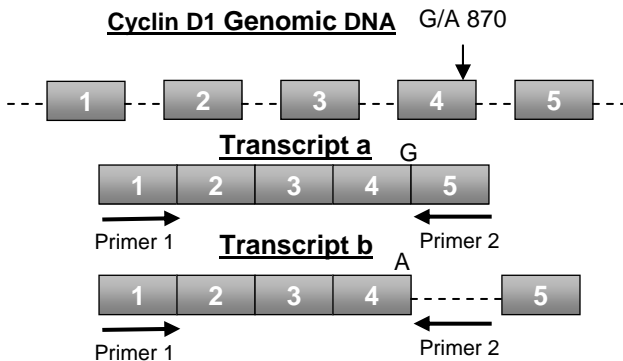

Supplement: pnas_0506281103_1.pdf [file pnas_0506281103_1.pdf]

A.

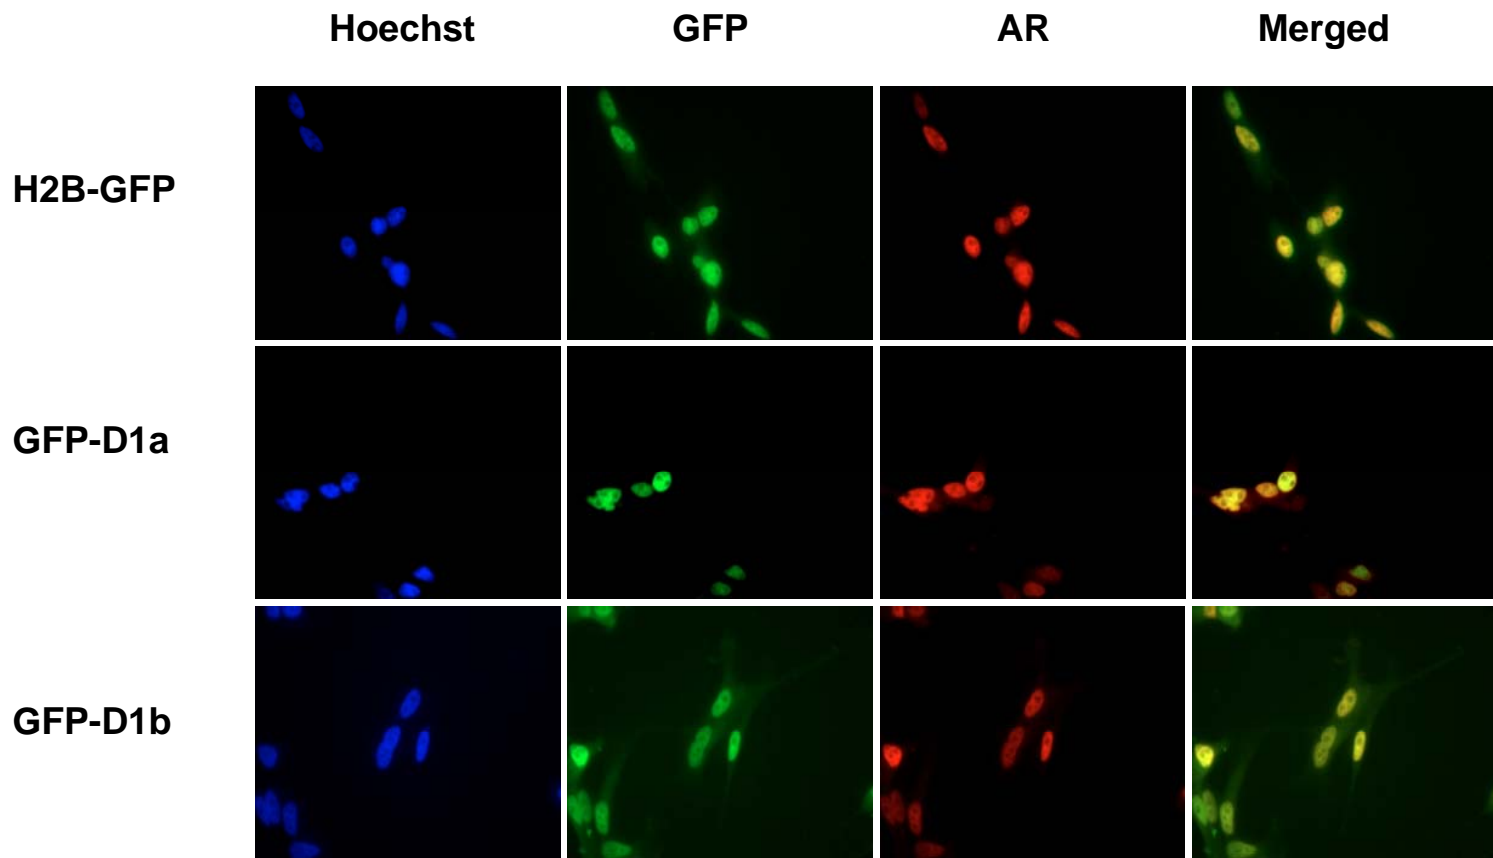

B.

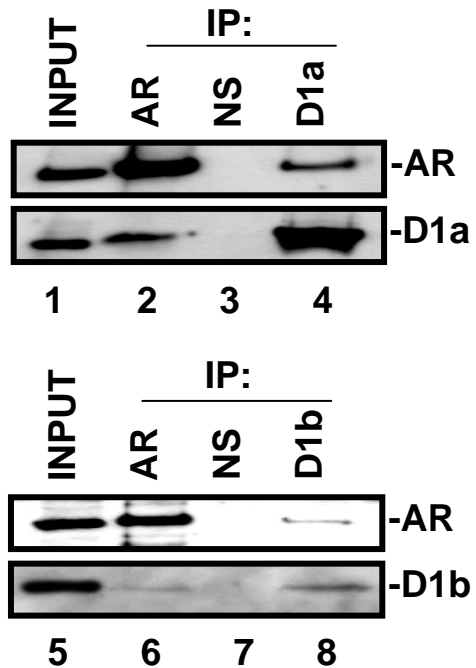

C.

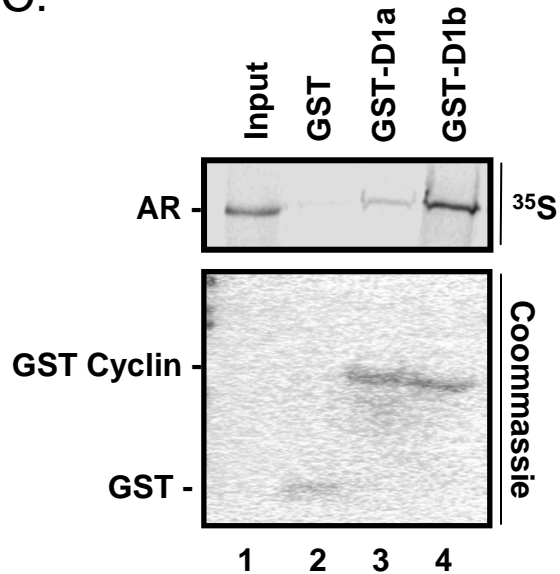

D.

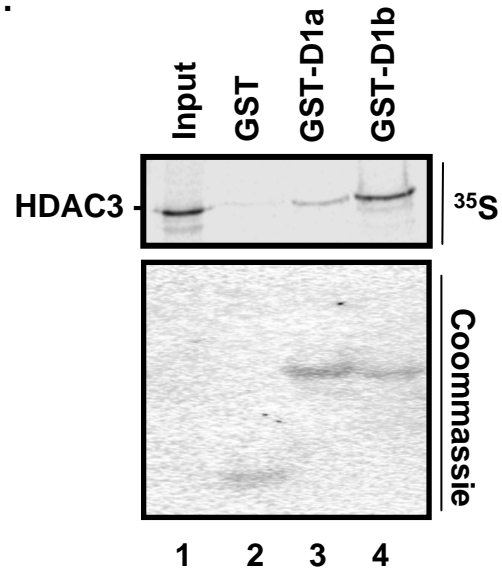

Supplement: pnas_0506281103_2.pdf [file pnas_0506281103_2.pdf]

# GAL4-LUC

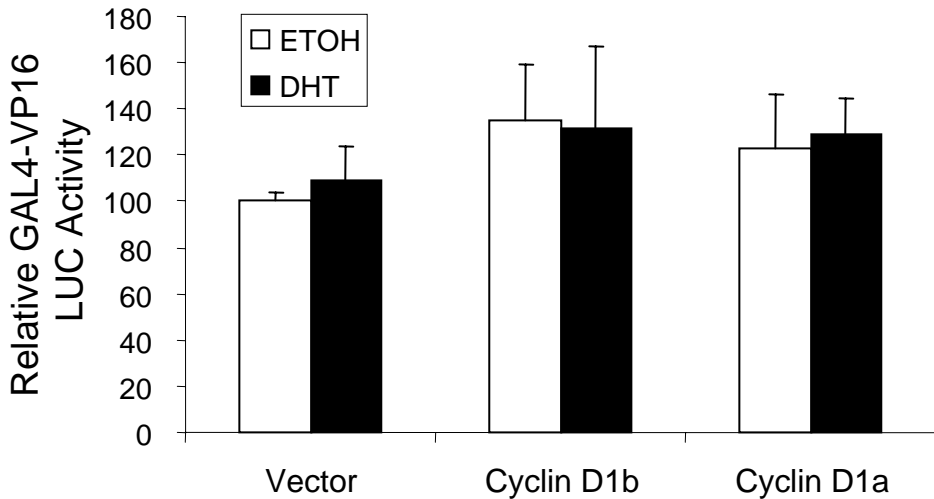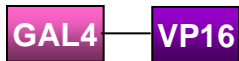

Supplement: pnas_0506281103_3.pdf [file pnas_0506281103_3.pdf]

## 8Palaa-LUC

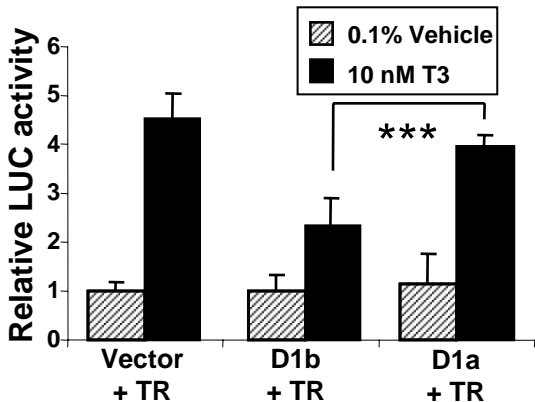

Supplement: pnas_0506281103_4.pdf [file pnas_0506281103_4.pdf]

A.

pg of purified protein

5      50      100      200

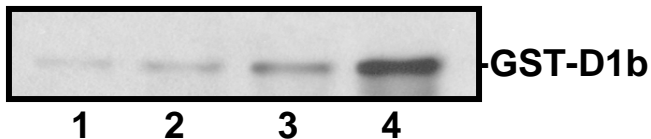

B.

MCF7      BT549      H520

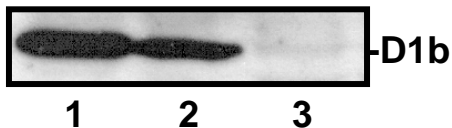

Supplement: pnas_0506281103_5.pdf [file pnas_0506281103_5.pdf]
